# Supplementary material
Source: publisher figshare collection journal article supplement (https://gsajournals.figshare.com/articles/dataset/_/6941477)
Supplement: Supplementary file 1 [file 1]

## Sheet: TableS1
Homokaryotic isolate #	Sample name	Geographic origin	Geographic zone	Collected by	Sampling year	Type	Senescent phenotype	Crossing success as acceptor (Growth rate)	Crossing success as acceptor (Wood degradation)	Crossing success as acceptor (Total)	Crossing success as donor (Growth rate)	Crossing success as donor (Wood degradation)	Crossing success as donor (Total)	Sample name	Illumina read-pairs	Overall alignment rate	Coverage	Mitochondrial haplotype
1	87_124_2	Oslo, Norway	1	Halvor Solheim	1987	Conidiospore	yes	0	0	0	5	4	5	87_124_2	25953658	0.9365	125.07	7
2	87_179_2	Oslo, Norway	1	Halvor Solheim	1987	Conidiospore	no	17	16	17	12	10	12	87_179_2	41009525	0.9291	205.41	8
3	87_183_3	Oslo, Norway	1	Halvor Solheim	1987	Conidiospore	yes	0	0	0	5	4	5	87_183_3	25391727	0.9306	121.17	9
4	87_215_3	Oslo, Norway	1	Halvor Solheim	1987	Conidiospore	yes	0	0	0	4	3	4	87_215_3	28979514	0.9414	149.29	10
5	95123	Yekaterinburg, Russia	3	Kari Korhonen	1995	Basidiospore	no	20	21	21	13	11	13	95123	17647901	0.9185	95.96	15
6	95126a	Yekaterinburg, Russia	3	Kari Korhonen	1995	Basidiospore	yes	0	0	0	3	3	3	95126a	22484286	0.9293	117.09	16
7	95156	Yekaterinburg, Russia	3	Kari Korhonen	1995	Basidiospore	yes	0	0	0	5	4	5	95156	18679388	0.9415	96.83	17
9	95191	Yekaterinburg, Russia	3	Kari Korhonen	1995	Basidiospore	no	11	11	11	11	10	11	95191	25653505	0.9403	132.73	3
10	Br518_c2	Brynge, Sweden	1	Jan Stenlid	1985	Conidiospore	yes	0	0	0	2	2	2	Br518_c2	26269358	0.9293	128.78	2
11	FSE_7	Helsinki, Finland	2	Kari Korhonen	1982	Basidiospore	no	19	18	19	12	12	12	FSE_7	36398854	0.9491	181.45	5
12	OH2_2	Bern, Switzerland	4	Ottmar Holldenrieder	1992	Conidiospore	yes	0	0	0	3	2	3	OH2_2	20077213	0.9479	99.11	1
13	Rb31_3	Ramsåsa, Sweden	1	Jan Stenlid	1985	Conidiospore	no	0	0	0	5	5	5	Rb31_3	26288679	0.9387	104.91	6
14	RB48_9	Ramsåsa, Sweden	1	Jan Stenlid	1985	Conidiospore	no	2	1	2	6	6	6	RB48_9	28636646	0.9589	115.35	6
15	RB94_11	Ramsåsa, Sweden	1	Jan Stenlid	1985	Conidiospore	no	0	0	0	7	7	7	RB94_11	23261104	0.9174	90.46	4
18	Sa_159-5 (ref)	Sätuna, Sweden	1	Jan Stenlid	1986	Conidiospore	no	13	13	13	11	10	11	Sa_159-5 (ref)	31801133	0.9921	162.6	3
19	87074_1	Vicenza, Italy	4	Kari Korhonen	1987	Basidiospore	no	14	14	14	12	11	12	87074_1	23270814	0.9502	107.28	1
20	87075_2	Vicenza, Italy	4	Kari Korhonen	1987	Basidiospore	yes*	17	6	17	12	8	12	87075_2	28391379	0.9402	141.53	1
21	90137_1	Kaunas, Lithuania	2	Kari Korhonen	1990	Basidiospore	yes	0	0	0	3	4	4	90137_1	24994348	0.9343	119.67	11
22	90166_2	Bielovieza, Belarus	2	Kari Korhonen	1990	Basidiospore	yes	0	0	0	4	3	4	90166_2	29940731	0.9529	142.34	12
23	91132_1	Saarema, Estonia	2	Kari Korhonen	1991	Basidiospore	yes	1	1	1	3	4	4	91132_1	27384096	0.9604	131.08	13
24	93028_1	Happerg, Germany	4	Kari Korhonen	1993	Basidiospore	yes*	24	11	24	11	10	11	93028_1	28341834	0.9479	136.3	1
25	93134_1	Aalborg, Denmark	1	Kari Korhonen	1993	Basidiospore	yes	0	0	0	3	2	3	93134_1	29914222	0.9423	134.06	14
26	Fas16_1	Munich, Germany	4	Helga Marxmüller	1988	Basidiospore	no	15	15	15	12	10	12	Fas16_1	25301375	0.937	130.68	1
27	FSE_3	Helsinki, Finland	2	Kari Korhonen	1982	Basidiospore	no	10	9	10	10	9	10	FSE_3	54893129	0.9556	264.08	5
30	HR32	Smolyan, Bulgaria	4	Panos Tsopelas	2005	Basidiospore	no	22	22	22	13	11	13	HR32	26289811	0.9495	132.05	18
31	Br244_4	Brynge, Sweden	1	Jan Stenlid	1985	Conidiospore	no	17	17	17	12	10	12	Br244_4	23625441	0.9431	118.72	2
32	Sa94_B_8	Sätuna, Sweden	1	Jan Stenlid	1986	Conidiospore	no	23	23	24	12	11	12	Sa94_B_8	30123038	0.9373	145.26	20
33	RB89c6	Ramsåsa, Sweden	1	Jan Stenlid	1985	Conidiospore	yes	0	0	0	7	6	7	RB89c6	31046552	0.9447	122.96	4
34	RB48B2	Ramsåsa, Sweden	1	Jan Stenlid	1985	Conidiospore	yes	0	0	0	4	4	4	RB48B2	26795676	0.9357	102.13	6
35	OH2_3c5	Bern, Switzerland	4	Ottmar Holldenrieder	1992	Conidiospore	yes	0	0	0	3	2	3	OH2_3c5	36119047	0.9291	167.14	19
						Table S1 List of the isolates
* Senescent phenotype observed in only one preculture

## Sheet: TableS2
	Asiago, Vicenza, Italy	Asiago, Vicenza, Italy	Spikkestad,Oslo, Norway	Spikkestad,Oslo, Norway	Spikkestad,Oslo, Norway	Spikkestad,Oslo, Norway	Kaunas, Lithuania	Bielovieza, Belarus(MINSK)	Sörve, Saarema, Estonia	Happerg, Bayern, Germany	Nörlund, Aalborg, Denmark	Pervouralsk, Ural, Russia	Pervouralsk, Ural, Russia	Ural, Russia	Ural, Russia	Brynge, Sweden	Brynge, Sweden	Munich, Germany	Helsinki, Finland	Helsinki, Finland	Mount Rhodope, Greece	Switzerland	Switzerland	Ramsåsa, Sweden	Ramsåsa, Sweden	Ramsåsa, Sweden	Ramsåsa, Sweden	Ramsåsa, Sweden	Sätuna, Sweden	Sätuna, Sweden
	87074_1:	87075_2:	87_124_2:	87_179_2:	87_183_3:	87_215_3:	90137_1:	90166_2:	91132_1:	93028_1:	93134_1:	95123:	95126a:	95156:	95191:	Br244_4:	Br518_c2:	Fas16_1:	FSE_3:	FSE_7:	HR32:	OH2_2:	OH2_3c5:	Rb31_3:	RB48_9:	RB48B2:	RB89c6:	RB94_11:	Sa94_B_8:
87074_1:	0
87075_2:	10	0
87_124_2:	1559	1559	0
87_179_2:	1559	1559	10	0
87_183_3:	1559	1559	10	10	0
87_215_3:	1559	1559	10	10	10	0
90137_1:	1326	1326	970	970	970	970	0
90166_2:	1425	1425	1345	1345	1345	1345	375	0
91132_1:	1699	1699	990	990	990	990	382	563	0
93028_1:	237	237	1323	1323	1323	1323	1163	1314	1524	0
93134_1:	1263	1263	301	301	301	301	896	1261	1032	1026	0
95123:	3525	3525	2884	2884	2884	2884	2277	2100	1991	3407	3002	0
95126a:	3525	3525	2884	2884	2884	2884	2277	2100	1991	3407	3002	10	0
95156:	3525	3525	2884	2884	2884	2884	2277	2100	1991	3407	3002	10	10	0
95191:	3525	3525	2884	2884	2884	2884	2277	2100	1991	3407	3002	10	10	10	0
Br244_4:	1860	1860	370	370	370	370	991	1343	865	1628	648	2604	2604	2604	2604	0
Br518_c2:	1860	1860	370	370	370	370	991	1343	865	1628	648	2604	2604	2604	2604	1	0
Fas16_1:	266	266	1293	1293	1293	1293	1130	1286	1490	34	997	3377	3377	3377	3377	1596	1956	0
FSE_3:	1823	1823	812	812	812	812	590	848	292	1623	934	2078	2078	2078	2078	609	609	1589	0
FSE_7:	1823	1823	812	812	812	812	590	848	292	1623	934	2078	2078	2078	2078	609	609	1589	1	0
HR32:	922	922	1998	1998	1998	1998	1269	1102	1616	1023	1763	3010	3010	3010	3010	2173	2173	1022	1858	1858	0
OH2_2:	357	357	1437	1437	1437	1437	1445	1621	1791	314	1137	3707	3707	3707	3707	1776	1776	338	1859	1859	1274	0
OH2_3c5:	357	357	1437	1437	1437	1437	1445	1621	1791	314	1137	3707	3707	3707	3707	1776	1776	338	1859	1859	1274	10	0
Rb31_3:	1100	1100	514	514	514	514	630	980	842	872	300	2834	2834	2834	2834	763	763	839	827	827	1486	1058	1058	0
RB48_9:	1100	1100	514	514	514	514	630	980	842	872	300	2834	2834	2834	2834	763	763	839	827	827	1486	1058	1058	10	0
RB48B2:	1100	1100	514	514	514	514	630	980	842	872	300	2834	2834	2834	2834	763	763	839	827	827	1486	1058	1058	10	1	0
RB89c6:	1100	1100	514	514	514	514	630	980	842	872	300	2834	2834	2834	2834	763	763	839	827	827	1486	1058	1058	10	10	10	0
RB94_11:	1100	1100	514	514	514	514	630	980	842	872	300	2834	2834	2834	2834	763	763	839	827	827	1486	1058	1058	10	10	10	10	0
Sa94_B_8:	1207	1207	400	400	400	400	672	1037	833	977	224	2820	2820	2820	2820	653	653	944	778	778	1598	1146	1146	116	116	116	116	116	0
Sa159-5(Ref):	1207	1207	400	400	400	400	672	1037	833	977	224	2820	2820	2820	2820	653	653	944	778	778	1598	1146	1146	116	116	116	116	116	10	0
Table S2 Geographic distance (km) between homokaryon isolates
https://www.geodatasource.com/distance-calculator

## Sheet: TableS3
1	2	3	4	5	6	7	9	10	11	12	13	14	15	18	19	20	21	22	23	24	25	26	27	30	31	32	33	34	35
0	0.400667	0.412597	0.394366	0.379228	0.431989	0.413097	0.400425	0.41257	0.413133	0.381105	0.409049	0.403151	0.373044	0.457172	0.408281	0.389398	0.399478	0.405886	0.419943	0.38526	0.409326	0.381462	0.418549	0.396493	0.419067	0.397619	0.409237	0.394661	0.410533
0.400667	0	0.391283	0.401024	0.371141	0.40417	0.401239	0.39291	0.42761	0.39148	0.380828	0.389791	0.403696	0.388013	0.448423	0.374295	0.405903	0.404527	0.395582	0.403777	0.392561	0.392016	0.386601	0.404295	0.437753	0.397324	0.395698	0.396127	0.398173	0.383929
0.412597	0.391283	0	0.401051	0.389612	0.387271	0.376779	0.383553	0.374519	0.384393	0.377173	0.364992	0.410157	0.383929	0.433508	0.368209	0.399282	0.386467	0.38728	0.373223	0.396163	0.386627	0.389398	0.393812	0.408146	0.384036	0.384947	0.364125	0.41341	0.390032
0.394366	0.401024	0.401051	0	0.384304	0.391096	0.376494	0.371221	0.377074	0.392418	0.360015	0.394107	0.382311	0.370327	0.441533	0.390765	0.381855	0.3956	0.374787	0.3961	0.383223	0.38988	0.374921	0.41022	0.408272	0.377584	0.369648	0.373777	0.392517	0.375108
0.379228	0.371141	0.389612	0.384304	0	0.386663	0.367646	0.368111	0.389603	0.392901	0.380461	0.385939	0.37148	0.39358	0.429523	0.391945	0.385537	0.386145	0.387459	0.405769	0.390801	0.389702	0.373276	0.419317	0.409523	0.392919	0.371292	0.389827	0.366154	0.388781
0.431989	0.40417	0.387271	0.391096	0.386663	0	0.379603	0.380157	0.418379	0.41349	0.403821	0.386851	0.394161	0.403643	0.43669	0.386011	0.412311	0.381927	0.413553	0.391596	0.396788	0.40702	0.387485	0.420318	0.415171	0.408575	0.398406	0.406466	0.391641	0.402186
0.413097	0.401239	0.376779	0.376494	0.367646	0.379603	0	0.373562	0.408709	0.376118	0.389398	0.382579	0.383652	0.404161	0.431489	0.40383	0.397941	0.377423	0.401668	0.411113	0.387852	0.393419	0.375207	0.410631	0.406878	0.403214	0.395457	0.372401	0.398522	0.398021
0.400425	0.39291	0.383553	0.371221	0.368111	0.380157	0.373562	0	0.409281	0.414688	0.40425	0.39543	0.376038	0.396761	0.434402	0.389156	0.408236	0.394259	0.397235	0.403571	0.395984	0.408021	0.406288	0.423124	0.399621	0.408861	0.408164	0.385233	0.414715	0.393375
0.41257	0.42761	0.374519	0.377074	0.389603	0.418379	0.408709	0.409281	0	0.387262	0.384831	0.411971	0.40761	0.401185	0.452409	0.388468	0.411355	0.401828	0.392472	0.393196	0.383982	0.394483	0.383669	0.405439	0.395466	0.180347	0.366118	0.404795	0.41971	0.398334
0.413133	0.39148	0.384393	0.392418	0.392901	0.41349	0.376118	0.414688	0.387262	0	0.383339	0.391534	0.406189	0.379818	0.45383	0.406547	0.408575	0.387396	0.403062	0.399657	0.398021	0.408683	0.390291	0.203394	0.409415	0.404518	0.388039	0.386359	0.422329	0.412409
0.381105	0.380828	0.377173	0.360015	0.380461	0.403821	0.389398	0.40425	0.384831	0.383339	0	0.389961	0.38308	0.372776	0.444411	0.36762	0.354885	0.379264	0.358397	0.365716	0.355823	0.41165	0.33249	0.405412	0.39787	0.386091	0.36241	0.375975	0.376699	0.340631
0.409049	0.389791	0.364992	0.394107	0.385939	0.386851	0.382579	0.39543	0.411971	0.391534	0.389961	0	0.370149	0.391426	0.428245	0.385966	0.389228	0.37207	0.399675	0.392284	0.388486	0.39089	0.37484	0.380417	0.3982	0.417235	0.387923	0.386976	0.375278	0.394009
0.403151	0.403696	0.410157	0.382311	0.37148	0.394161	0.383652	0.376038	0.40761	0.406189	0.38308	0.370149	0	0.397021	0.422561	0.375743	0.378915	0.364867	0.39728	0.399469	0.412776	0.397164	0.384813	0.40551	0.405242	0.423991	0.380577	0.374876	0.181643	0.40005
0.373044	0.388013	0.383929	0.370327	0.39358	0.403643	0.404161	0.396761	0.401185	0.379818	0.372776	0.391426	0.397021	0	0.448736	0.39845	0.393634	0.365412	0.396645	0.387557	0.373714	0.391221	0.391114	0.395314	0.380318	0.408647	0.393884	0.299836	0.415287	0.381346
0.457172	0.448423	0.433508	0.441533	0.429523	0.43669	0.431489	0.434402	0.452409	0.45383	0.444411	0.428245	0.422561	0.448736	0	0.411337	0.435635	0.444232	0.450407	0.421104	0.46399	0.430041	0.449862	0.465411	0.445126	0.472507	0.43013	0.456779	0.441953	0.452963
0.408281	0.374295	0.368209	0.390765	0.391945	0.386011	0.40383	0.389156	0.388468	0.406547	0.36762	0.385966	0.375743	0.39845	0.411337	0	0.357968	0.374912	0.381123	0.363938	0.372472	0.393375	0.362115	0.418504	0.381096	0.407226	0.367137	0.398933	0.387771	0.373008
0.389398	0.405903	0.399282	0.381855	0.385537	0.412311	0.397941	0.408236	0.411355	0.408575	0.354885	0.389228	0.378915	0.393634	0.435635	0.357968	0	0.371614	0.382347	0.407181	0.367655	0.400658	0.350649	0.420979	0.388433	0.421069	0.38341	0.394921	0.372696	0.387566
0.399478	0.404527	0.386467	0.3956	0.386145	0.381927	0.377423	0.394259	0.401828	0.387396	0.379264	0.37207	0.364867	0.365412	0.444232	0.374912	0.371614	0	0.390211	0.369023	0.378075	0.413205	0.380551	0.389076	0.371453	0.397744	0.378817	0.367861	0.366887	0.39543
0.405886	0.395582	0.38728	0.374787	0.387459	0.413553	0.401668	0.397235	0.392472	0.403062	0.358397	0.399675	0.39728	0.396645	0.450407	0.381123	0.382347	0.390211	0	0.403151	0.39224	0.40467	0.361132	0.412695	0.403455	0.386261	0.384384	0.397021	0.401319	0.366967
0.419943	0.403777	0.373223	0.3961	0.405769	0.391596	0.411113	0.403571	0.393196	0.399657	0.365716	0.392284	0.399469	0.387557	0.421104	0.363938	0.407181	0.369023	0.403151	0	0.38955	0.407539	0.379675	0.405662	0.40114	0.407181	0.358567	0.384876	0.400452	0.377432
0.38526	0.392561	0.396163	0.383223	0.390801	0.396788	0.387852	0.395984	0.383982	0.398021	0.355823	0.388486	0.412776	0.373714	0.46399	0.372472	0.367655	0.378075	0.39224	0.38955	0	0.411784	0.34585	0.399022	0.389085	0.392624	0.382758	0.394358	0.397441	0.359907
0.409326	0.392016	0.386627	0.38988	0.389702	0.40702	0.393419	0.408021	0.394483	0.408683	0.41165	0.39089	0.397164	0.391221	0.430041	0.393375	0.400658	0.413205	0.40467	0.407539	0.411784	0	0.408629	0.447074	0.398638	0.399818	0.380408	0.398763	0.403508	0.417574
0.381462	0.386601	0.389398	0.374921	0.373276	0.387485	0.375207	0.406288	0.383669	0.390291	0.33249	0.37484	0.384813	0.391114	0.449862	0.362115	0.350649	0.380551	0.361132	0.379675	0.34585	0.408629	0	0.405752	0.37669	0.388343	0.363035	0.393509	0.378808	0.353554
0.418549	0.404295	0.393812	0.41022	0.419317	0.420318	0.410631	0.423124	0.405439	0.203394	0.405412	0.380417	0.40551	0.395314	0.465411	0.418504	0.420979	0.389076	0.412695	0.405662	0.399022	0.447074	0.405752	0	0.414509	0.399156	0.40593	0.392972	0.405171	0.417449
0.396493	0.437753	0.408146	0.408272	0.409523	0.415171	0.406878	0.399621	0.395466	0.409415	0.39787	0.3982	0.405242	0.380318	0.445126	0.381096	0.388433	0.371453	0.403455	0.40114	0.389085	0.398638	0.37669	0.414509	0	0.404071	0.395153	0.4124	0.412463	0.429639
0.419067	0.397324	0.384036	0.377584	0.392919	0.408575	0.403214	0.408861	0.180347	0.404518	0.386091	0.417235	0.423991	0.408647	0.472507	0.407226	0.421069	0.397744	0.386261	0.407181	0.392624	0.399818	0.388343	0.399156	0.404071	0	0.382445	0.401891	0.418003	0.391301
0.397619	0.395698	0.384947	0.369648	0.371292	0.398406	0.395457	0.408164	0.366118	0.388039	0.36241	0.387923	0.380577	0.393884	0.43013	0.367137	0.38341	0.378817	0.384384	0.358567	0.382758	0.380408	0.363035	0.40593	0.395153	0.382445	0	0.39476	0.381989	0.382758
0.409237	0.396127	0.364125	0.373777	0.389827	0.406466	0.372401	0.385233	0.404795	0.386359	0.375975	0.386976	0.374876	0.299836	0.456779	0.398933	0.394921	0.367861	0.397021	0.384876	0.394358	0.398763	0.393509	0.392972	0.4124	0.401891	0.39476	0	0.395966	0.381721
0.394661	0.398173	0.41341	0.392517	0.366154	0.391641	0.398522	0.414715	0.41971	0.422329	0.376699	0.375278	0.181643	0.415287	0.441953	0.387771	0.372696	0.366887	0.401319	0.400452	0.397441	0.403508	0.378808	0.405171	0.412463	0.418003	0.381989	0.395966	0	0.398656
0.410533	0.383929	0.390032	0.375108	0.388781	0.402186	0.398021	0.393375	0.398334	0.412409	0.340631	0.394009	0.40005	0.381346	0.452963	0.373008	0.387566	0.39543	0.366967	0.377432	0.359907	0.417574	0.353554	0.417449	0.429639	0.391301	0.382758	0.381721	0.398656	0
Table S3A: Nuclear genetic distance between pairs of homokaryon isolates
1	2	3	4	5	6	7	8	9	10	11	12	13	14	15	16	17	18	19	20
0	0.317241	0.365517	0.227586	0.255172	0.255172	0.227586	0.193103	0.275862	0.172414	0.255172	0.268966	0.310345	0.262069	0.262069	0.262069	0.372414	0.248276	0.2	0.296552
0.317241	0	0.489655	0.42069	0.448276	0.42069	0.324138	0.372414	0.165517	0.337931	0.393103	0.172414	0.282759	0.206897	0.441379	0.427586	0.496552	0.386207	0.186207	0.255172
0.365517	0.489655	0	0.275862	0.303448	0.317241	0.289655	0.241379	0.42069	0.234483	0.275862	0.427586	0.427586	0.393103	0.227586	0.324138	0.00689655	0.268966	0.386207	0.4
0.227586	0.42069	0.275862	0	0.151724	0.165517	0.17931	0.103448	0.351724	0.0827586	0.17931	0.358621	0.303448	0.324138	0.158621	0.172414	0.282759	0.172414	0.275862	0.317241
0.255172	0.448276	0.303448	0.151724	0	0.0551724	0.206897	0.131034	0.37931	0.110345	0.206897	0.386207	0.344828	0.351724	0.186207	0.062069	0.310345	0.2	0.303448	0.372414
0.255172	0.42069	0.317241	0.165517	0.0551724	0	0.193103	0.144828	0.351724	0.124138	0.22069	0.358621	0.317241	0.324138	0.2	0.00689655	0.324138	0.213793	0.303448	0.344828
0.227586	0.324138	0.289655	0.17931	0.206897	0.193103	0	0.131034	0.241379	0.124138	0.193103	0.248276	0.262069	0.213793	0.172414	0.186207	0.296552	0.186207	0.262069	0.248276
0.193103	0.372414	0.241379	0.103448	0.131034	0.144828	0.131034	0	0.289655	0.062069	0.158621	0.296552	0.268966	0.275862	0.110345	0.151724	0.248276	0.151724	0.2	0.282759
0.275862	0.165517	0.42069	0.351724	0.37931	0.351724	0.241379	0.289655	0	0.310345	0.324138	0.0758621	0.2	0.110345	0.344828	0.358621	0.427586	0.317241	0.0896552	0.158621
0.172414	0.337931	0.234483	0.0827586	0.110345	0.124138	0.124138	0.062069	0.310345	0	0.137931	0.317241	0.248276	0.282759	0.117241	0.131034	0.241379	0.131034	0.234483	0.303448
0.255172	0.393103	0.275862	0.17931	0.206897	0.22069	0.193103	0.158621	0.324138	0.137931	0	0.331034	0.344828	0.310345	0.213793	0.227586	0.282759	0.00689655	0.289655	0.344828
0.268966	0.172414	0.427586	0.358621	0.386207	0.358621	0.248276	0.296552	0.0758621	0.317241	0.331034	0	0.151724	0.131034	0.393103	0.365517	0.434483	0.324138	0.110345	0.165517
0.310345	0.282759	0.427586	0.303448	0.344828	0.317241	0.262069	0.268966	0.2	0.248276	0.344828	0.151724	0	0.2	0.310345	0.324138	0.434483	0.337931	0.193103	0.22069
0.262069	0.206897	0.393103	0.324138	0.351724	0.324138	0.213793	0.275862	0.110345	0.282759	0.310345	0.131034	0.2	0	0.317241	0.331034	0.4	0.303448	0.144828	0.0896552
0.262069	0.441379	0.227586	0.158621	0.186207	0.2	0.172414	0.110345	0.344828	0.117241	0.213793	0.393103	0.310345	0.317241	0	0.206897	0.22069	0.206897	0.296552	0.37931
0.262069	0.427586	0.324138	0.172414	0.062069	0.00689655	0.186207	0.151724	0.358621	0.131034	0.227586	0.365517	0.324138	0.331034	0.206897	0	0.331034	0.22069	0.310345	0.337931
0.372414	0.496552	0.00689655	0.282759	0.310345	0.324138	0.296552	0.248276	0.427586	0.241379	0.282759	0.434483	0.434483	0.4	0.22069	0.331034	0	0.275862	0.393103	0.406897
0.248276	0.386207	0.268966	0.172414	0.2	0.213793	0.186207	0.151724	0.317241	0.131034	0.00689655	0.324138	0.337931	0.303448	0.206897	0.22069	0.275862	0	0.282759	0.337931
0.2	0.186207	0.386207	0.275862	0.303448	0.303448	0.262069	0.2	0.0896552	0.234483	0.289655	0.110345	0.193103	0.144828	0.296552	0.310345	0.393103	0.282759	0	0.193103
0.296552	0.255172	0.4	0.317241	0.372414	0.344828	0.248276	0.282759	0.158621	0.303448	0.344828	0.165517	0.22069	0.0896552	0.37931	0.337931	0.406897	0.337931	0.193103	0
Table S3: Genetic distance between pairs of mitochondrial haplotypes

## Sheet: TableS4
											Ho nuclei acceptors
		1	2	3	4	5	6	7	9	10	11	12	13	14	15	18	19	20	21	22	23	24	25	26	27	30	31	32	33	34	35
	1					C											C					C		C				C				5		C	Het single
	2					C			C		C					C	C	C				C		C	C	C	C	C				12		C	Het in a pair
	3		C			C												C				C						C				5
	4					C																C				C		C				4
	5		C						C		C			C		C	C	C				C		C	C	C	C	C				13
	6										C															C		C				3
	7										C							C				C		C			C					5
	9		C			C					C					C	C	C				C		C		C	C	C				11
Ho nuclei donors	10																					C						C				2
	11		C			C			C							C	C	C			C	C		C		C	C	C				12
	12					C												C								C						3
	13					C																C				C	C	C				5
	14		C			C												C				C				C		C				6
	15		C			C					C						C	C								C		C				7
	18		C						C		C						C	C				C		C	C	C	C	C				11
	19		C			C			C		C					C		C				C		C	C	C	C	C				12
	20		C			C			C		C					C	C					C		C	C	C	C	C				12
	21										C															C	C	C				4
	22					C					C											C				C						4
	23					C					C															C		C				4
	24		C			C					C					C	C	C						C	C	C	C	C				11
	25										C					C						C										3
	26		C			C			C		C					C	C	C				C			C	C	C	C				12
	27		C			C			C								C	C				C		C		C	C	C				10
	30		C			C			C		C			C		C	C	C				C		C	C		C	C				13
	31		C			C			C		C					C	C	C				C		C	C	C		C				12
	32		C			C			C		C					C	C	C				C		C	C	C	C					12
	33		C			C										C						C				C	C	C				7
	34		C								C											C					C					4
	35																					C		C				C				3
		0	17	0	0	21	0	0	11	0	19	0	0	2	0	13	14	17	0	0	1	24	0	15	10	22	17	24	0	0	0	227	Heterokaryons
	Table S4: Unbalanced diallel with reciprocals but no selfed crosses
	Only 227 crosses (among the 870 crosses performed) were successfull (i.e. the presence of clamp connections was detected)

## Sheet: TableS5
Nuclear genetic effects	Mitochondrial genetic effect	Df	LL	AIC	AICc	ΔAICc	weight	model name in Figshare
full covariance of nuclear genetic effects (σ2parent ≠ 0)	no covariance of mitochondrial genetic effects (σ2homhet = 0)	15	2836.76	-5643.51	-5643.42	0	0.681	m01
full covariance of nuclear genetic effects (σ2parent ≠ 0)	full covariance of mitochondrial genetic effects (σ2homhet ≠ 0)	17	2837.86	-5641.73	-5641.62	1.806	0.276	m00
no covariance of homokaryon nuclear genetic effects (σ2parent = 0 and σaccdon ≠ 0)	no covariance of mitochondrial genetic effects (σ2homhet = 0)	14	2832.45	-5636.91	-5636.83	6.59	0.025	m03
no covariance of homokaryon nuclear genetic effects (σ2parent = 0 and σaccdon ≠ 0)	full covariance of mitochondrial genetic effects (σ2homhet ≠ 0)	16	2834.05	-5636.09	-5635.99	7.432	0.017	m02
no covariance of nuclear genetic effects (σ2parent = 0 and σ2accdon = 0)	no covariance of mitochondrial genetic effects (σ2homhet = 0)	13	2827.75	-5629.51	-5629.44	13.984	0.001	m05
no covariance of nuclear genetic effects (σ2parent = 0 and σ2accdon = 0)	full covariance of mitochondrial genetic effects (σ2homhet ≠ 0)	15	2828.89	-5627.79	-5627.7	15.722	0	m04
Table S5A Step1 AICc model selection for mycelium growth rate data. All models included genetic distance and type (homokaryon vs. heterokaryons) as fixed effects.
We report the number of fitted parameters (Df), the log-Likelihood (LL), the difference in corrected Akaike’s information criteria compared to the best model (ΔAICc) and model weight (w).
Nuclear genetic effects	Mitochondrial genetic effect	Df	LL	AIC	AICc	ΔAICc	weight	model name in Figshare
cnucl=1	No mitochondrial genetic effect	14	2840.8	-5653.6	-5653.53	0	0.575	m001
cnucl≠1	No mitochondrial genetic effect	15	2841.51	-5653.01	-5652.92	0.602	0.425	m000
Table S5B Step2 AICc model selection to test for cnucl on mycelium growth rate.
We report the number of fitted parameters (Df), the log-Likelihood (LL), the difference in corrected Akaike’s information criteria compared to the best model (ΔAICc) and model weight (w).
Fixed effects	Nuclear and mitochondrial genetic effect	Df	LL	AIC	AICc	ΔAICc	weight	model name in Figshare
-	cnucl=1, no covariance of mitochondrial genetic effects	12	2840.45	-5656.89	-5656.83	0	0.503	m0
Genetic distance	cnucl=1, no covariance of mitochondrial genetic effects	13	2840.53	-5655.07	-5655	1.834	0.201	m2
Type	cnucl=1, no covariance of mitochondrial genetic effects	13	2840.53	-5655.05	-5654.99	1.848	0.2	m1
Type + genetic distance	cnucl=1, no covariance of mitochondrial genetic effects	14	2840.8	-5653.6	-5653.53	3.308	0.096	m3
Table S5C Step3 AICc model selection for type effects (mean differences between homokaryons and heterokaryons) and genetic distance on mycelium growth rate.
We report the number of fitted parameters (Df), the log-Likelihood (LL), the difference in corrected Akaike’s information criteria compared to the best model (ΔAICc) and model weight (w).

## Sheet: TableS6
Effect	Variable	Estimates	2.5%CI	97.5%CI
Fixed effects	intercept	1.85825	1.42695	2.2816
	type (homokaryon)	-0.585516	-1.56872	0.409305
	standardized genetic distance	-0.097482	-0.261248	0.0461382
	donor slow grower	-0.171488	-0.240827	-0.118532
	cnucl	0.694639	0.37	1.15
Random nuclear genetic effects	homokaryon	0.321468	0.0989106	0.611548
	acceptor	0.0203018	0.0083137	0.0341817
	donor	0.0168736	0.00628192	0.0291399
	acceptor-donor correlation	0.849471	0.474986	1
	acceptor-homokaryon/donor-homokaryon correlation	0.448455	0.211287	0.695467
	acceptor x donor	0.000894795	0	0.00548744
Random mitochondrial genetic effects	homokaryon mitochondria	0.151689	0	0.397529
	heterokaryon mitochondria	0.00353225	0	0.0153821
Random environmental effects	assay	0.0403755	0.0346259	0.0469567
	plate	0.0122845	0.0104532	0.0139115
	residual variance	0.0110337	0.0107278	0.0114864
Table S6 Estimates for the best mycelium growth rate model (step1).

## Sheet: Table S7
Type	Variable	Estimate	2.5% CI	97.5% CI
Heterokaryon	acceptor nuclear genetic effect	0.16	0.07	0.23
	donor nuclear genetic effect	0.16	0.07	0.24
	acceptor x donor nuclear genetic effect	0.01	0	0.05
	heterokaryon mitochondrial	0.03	0	0.15
	genetic effect
	assay	0.4	0.32	0.51
	plate	0.12	0.09	0.15
	residual variance	0.11	0.09	0.13
Homokaryon	homokaryon nuclear genetic effect	0.46	0.11	0.82
	homokaryon mitochondrial genetic effect	0.35	0	0.74
	assay	0.12	0.06	0.25
	plate	0.04	0.02	0.08
	residual variance	0.03	0.02	0.07
Table S7 Proportion of variance in MGR explained by genetic and environmental effects for both heterokaryons and homokaryons.
95% confidence intervals were computed using parametric bootstrap.

## Sheet: TableS8
Nuclear genetic effects	Mitochondrial genetic effect	Df	LL	AIC	AICc	ΔAICc	weight	model name in Figshare
no covariance of homokaryon nuclear genetic effects (σ2parent = 0 and σaccdon ≠ 0)	no covariance of mitochondrial genetic effects (σ2homhet = 0)	14	2231.46	-4434.93	-4434.6	0	0.388	m03
no covariance of nuclear genetic effects (σ2parent = 0 and σ2accdon = 0)	no covariance of mitochondrial genetic effects (σ2homhet = 0)	13	2230.37	-4434.74	-4434.45	0.148	0.36	m05
full covariance of nuclear genetic effects (σ2parent ≠ 0)	no covariance of mitochondrial genetic effects (σ2homhet = 0)	15	2231.45	-4432.9	-4432.52	2.076	0.137	m01
no covariance of homokaryon nuclear genetic effects (σ2parent = 0 and σaccdon ≠ 0)	full covariance of mitochondrial genetic effects (σ2homhet ≠ 0)	16	2231.46	-4430.93	-4430.5	4.099	0.05	m02
no covariance of nuclear genetic effects (σ2parent = 0 and σ2accdon = 0)	full covariance of mitochondrial genetic effects (σ2homhet ≠ 0)	15	2230.37	-4430.74	-4430.36	4.24	0.047	m04
full covariance of nuclear genetic effects (σ2parent ≠ 0)	full covariance of mitochondrial genetic effects (σ2homhet ≠ 0)	17	2231.45	-4428.9	-4428.41	6.181	0.018	m00
Table S8A Step1 AICc model selection for wood weight loss. All models included genetic distance and type (homokaryon vs. heterokaryons) as fixed effects.
We report the number of fitted parameters (Df), the log-Likelihood (LL), the difference in corrected Akaike’s information criteria compared to the best model (ΔAICc) and model weight (w).
As σ2parent = 0 and σ2homhet = 0, we could not perform step 2 model selection to test if cnucl≠1 or cmit≠1.
Fixed effects	Nuclear and mitochondrial genetic effect	Df	LL	AIC	AICc	ΔAICc	weight	model name in Figshare
-	no covariance of nuclear genetic effects, no covariance of mitochondrial genetic effects	12	2246.65	-4469.3	-4469.05	0	0.533	m0
Type	no covariance of nuclear genetic effects, no covariance of mitochondrial genetic effects	13	2246.7	-4467.39	-4467.1	1.948	0.201	m1
Genetic distance	no covariance of nuclear genetic effects, no covariance of mitochondrial genetic effects	13	2246.65	-4467.3	-4467.01	2.04	0.192	m2
Type + genetic distance	no covariance of nuclear genetic effects, no covariance of mitochondrial genetic effects	14	2246.71	-4465.41	-4465.08	3.972	0.073	m3
Table S8B Step3 AICc model selection for type effects (mean differences between homokaryons and heterokaryons) and genetic distance on wood weight loss.
We report the number of fitted parameters (Df), the log-Likelihood (LL), the difference in corrected Akaike’s information criteria compared to the best model (ΔAICc) and model weight (w).

## Sheet: TableS9
Effect	Variable	Estimates	2.5%CI	97.5%CI
Fixed effects	intercept	0.245055	0.0770417	0.383411
	type (homokaryon)	-0.0805806	-0.316401	0.195444
	standardized genetic distance	-0.00426417	-0.0257762	0.0136069
	donor slow grower	-0.0656811	-0.0808467	-0.0516983
	initial weight	0.0195649	0.018133	0.0214941
Random nuclear genetic effects	homokaryon	0.00389234	0	0.0234542
	acceptor	0.0049958	0.00185535	0.00867842
	donor	0.00641311	0.00394508	0.00927002
	acceptor-donor correlation	0.838487	0.513495	0.964387
	acceptor x donor	2.3039e-05	0	7.96768e-05
Random mitochondrial genetic effects	homokaryon mitochondria	0.0273025	6.6134e-13	0.0673517
	heterokaryon mitochondria	6.59382e-05	0	0.000482206
Random environmental effects	plate	0.000623784	0.000498725	0.00074133
	residual variance	0.00068927	0.00062991	0.000771258
Table S9 Estimates for the best wood weight loss model (ability to degrade wood, step1).
This trait was estimated in heterokaryons from a single synthesis measured in a single assay, which can potentially bias the estimation of genetic effects.

## Sheet: TableS10
Type	Variable	Estimates	2.5%CI	97.5%CI
Heterokaryon	acceptor nuclear genetic effect	0.506499	0.422073	0.598678
	donor nuclear genetic effect	0.376789	0.23335	0.488225
	acceptor x donor nuclear genetic effect	0.00193099	0	0.00731712
	heterokaryon mitochondrial genetic effect	0.0050402	0	0.0370724
	plate	0.0521162	0.0319665	0.0820775
	residual variance	0.0576252	0.0364651	0.097555
Homokaryon	homokaryon nuclear genetic effect	0.15544	0	0.942593
	homokaryon mitochondrial genetic effect	0.786776	3.59791e-11	0.971897
	plate	0.0272793	0.00837294	0.0989686
	residual variance	0.0305048	0.00939558	0.119067
Table S10 Proportion of variance in WWL (wood degradation ability) explained by genetic and environmental effects for both heterokaryons and homokaryons.
95% confidence intervals were computed using parametric bootstrap.
